# Supplementary material for: Cooperation of Zr(iv)–N and Zr(iv)–O coordinate bonds of Zr(iv)–amide ensures the transparent and tough polyacrylamide hydrogels
Source: Royal Society of Chemistry journal article supplement (doi:10.1039/d2tb01496c), 2022-01-01
Supplement: d2tb01496c1.pdf [file d2tb01496c1.pdf]

## Supporting Materials for

# Cooperation of Zr(IV)-N and Zr(IV)-O coordinate bonds of Zr(IV)-amide ensures the transparent and tough polyacrylamide hydrogels

Chenglong Dong <sup>a</sup>, Mengfan Lu <sup>a</sup>, Hailong Fan <sup>b</sup> and Zhaoxia Jin <sup>a,\*</sup>

<sup>a</sup> Key Laboratory of Advanced Light Conversion Materials and Biophotonics, Department of Chemistry, Renmin University of China, Beijing 100872, People's Republic of China.

<sup>b</sup> Institute for Chemical Reaction Design and Discovery (WPI-ICReDD), Hokkaido University, N21W10, Kita-ku, Sapporo 001-0021, Japan

\* Corresponding author:

E-mail: jinzx@ruc.edu.cn. (Zhaoxia Jin)

Number of pages: 27

Number of tables: 5

Number of figures: 18

## Contents

|                                                                                                                                               |    |
|-----------------------------------------------------------------------------------------------------------------------------------------------|----|
| 1. Supporting Tables .....                                                                                                                    | 4  |
| Table S1. The mechanical properties of Zr-PAAm hydrogels. ....                                                                                | 4  |
| Table S2. The change of pH values before and after swelling in water. ....                                                                    | 5  |
| Table S3. The mechanical properties of Zr-PAAm(s) hydrogels. ....                                                                             | 6  |
| Table S4. The <i>RGB</i> value of the different interference colors of dried Zr-PAAm hydrogels under different tensile strains. ....          | 7  |
| Table S5. The <i>RGB</i> values of the interference colors of Zr-PAAm (0.4-NO <sub>3</sub> ) dried gels under different tensile strains. .... | 8  |
| 2. Supporting Figures .....                                                                                                                   | 9  |
| Figure S1. The schematic illustration for the measurement of polarized UV-Vis spectra of stretched samples. ....                              | 9  |
| Figure S2. The transmittance of 0.4-Cl and 0.4-SO <sub>4</sub> hydrogels. ....                                                                | 10 |
| Figure S3. The fracture energy of PAAm and Zr-PAAm hydrogels. ....                                                                            | 11 |
| Figure S4. The energy dissipation coefficient of Zr-PAAm hydrogels. ....                                                                      | 12 |
| Figure S5. The successively tensile loading-unloading curves of Zr-PAAm hydrogels. ....                                                       | 13 |
| Figure S6. SEM images of 0.2-X(s) hydrogels and pore sizes of <i>m</i> -Cl(s) hydrogels. ....                                                 | 14 |
| Figure S7. The size variations of Zr-PAAm hydrogels after swelling in water for 3 days at 60 °C. ....                                         | 15 |
| Figure S8. High-resolution XPS spectra of deconvoluted O 1s and N 1s of Zr-PAAm(s) hydrogels. ....                                            | 16 |
| Figure S9. The mechanical properties of Zr-PAAm hydrogels after swelling in water for 3 days at 60 °C. ....                                   | 17 |
| Figure S10. The summary of the change ratios of mechanical properties of hydrogels before and after swelling in water. ....                   | 18 |

|                                                                                                                                                                                |    |
|--------------------------------------------------------------------------------------------------------------------------------------------------------------------------------|----|
| Figure S11. The mechanical properties of Zr-PAAm (0.6-Cl(s)) hydrogels after swelling in concentrated NaCl solutions and HCl solution. ....                                    | 19 |
| Figure S12. The property changes of 0.6-NO <sub>3</sub> (s) and 0.6-SO <sub>4</sub> (s) hydrogels after swelling in 20 wt.% HCl solution for 10 days at room temperature. .... | 20 |
| Figure S13. The property changes of as-prepared Zr-PAAm (0.6-Cl) hydrogels after swelling in 20 wt.% HCl solution for 10 days at room temperature. ....                        | 21 |
| Figure S14. The formation of PAAm hydrogels in the presence of different metal ions. ....                                                                                      | 22 |
| Figure S15. The storage moduli (G') and loss moduli (G''), loss factor of hydrogels prepared by different metal ions. ....                                                     | 23 |
| Figure S16. The interference colors of chemically crosslinked PAAm hydrogels under successively increasing tensile strains. ....                                               | 24 |
| Figure S17. The change of the interference color of a stretched Zr-PAAm (0.4-NO <sub>3</sub> ) hydrogel during drying. ....                                                    | 25 |
| Figure S18. The UV-vis absorption spectra between crossed polarizers of 0.4-NO <sub>3</sub> , 0.4-Cl, and 0.4-SO <sub>4</sub> dried gels at 20 mm/mm tensile strains. ....     | 26 |
| 3. Reference .....                                                                                                                                                             | 27 |

Table S1. The mechanical properties of Zr-PAAm hydrogels.

| zirconium salts                   | concentration (M) | $\epsilon_b$ (mm/mm) | $\sigma_b$ (MPa) | $E$ (MPa) | $W_e$ MJ m <sup>-3</sup> |
|-----------------------------------|-------------------|----------------------|------------------|-----------|--------------------------|
| Zr(NO <sub>3</sub> ) <sub>4</sub> | 0.2               | 50.2±2.92            | 2.65± 0.17       | 0.15±0.04 | 75.06±6.65               |
|                                   | 0.4               | 48.84±1.25           | 3.81± 0.07       | 0.29±0.08 | 101.3±4.61               |
|                                   | 0.6               | 27.43±1.35           | 3.99±0.12        | 0.65±0.11 | 55.15±5.19               |
| ZrCl <sub>4</sub>                 | 0.2               | 45.39±2.99           | 2.63±0.07        | 0.17±0.05 | 71.93±2.92               |
|                                   | 0.4               | 30.38±0.87           | 3.29±0.22        | 0.45±0.03 | 78.88±7.31               |
|                                   | 0.6               | 25.77±1.37           | 3.28±0.24        | 0.75±0.10 | 46.86±6.29               |
| Zr(SO <sub>4</sub> ) <sub>2</sub> | 0.2               | 40.9±0.83            | 1.43±0.07        | 0.15±0.05 | 31.28±5.1                |
|                                   | 0.4               | 31.28±1.75           | 1.34±0.05        | 0.19±0.01 | 20.09±1.7                |
|                                   | 0.6               | 33.95±0.89           | 1.74±0.19        | 0.23±0.02 | 26.06±2.77               |

Table S2. The change of pH values before and after swelling in water for 3 days at 60 °C.

| zirconium salts                   | sample name         | pH of precursor solutions | pH of water after 3 days' swelling |
|-----------------------------------|---------------------|---------------------------|------------------------------------|
| Zr(NO <sub>3</sub> ) <sub>4</sub> | 0.2-NO <sub>3</sub> | 0.87                      | 6.18                               |
|                                   | 0.4-NO <sub>3</sub> | 0.65                      | 6.37                               |
|                                   | 0.6-NO <sub>3</sub> | 0.49                      | 6.10                               |
| ZrCl <sub>4</sub>                 | 0.2-Cl              | 0.54                      | 6.40                               |
|                                   | 0.4-Cl              | 0.32                      | 6.27                               |
|                                   | 0.6-Cl              | 0.15                      | 6.33                               |
| Zr(SO <sub>4</sub> ) <sub>2</sub> | 0.2-SO <sub>4</sub> | 0.72                      | 6.48                               |
|                                   | 0.4-SO <sub>4</sub> | 0.68                      | 6.27                               |
|                                   | 0.6-SO <sub>4</sub> | 0.58                      | 6.34                               |

Table S3. The mechanical properties of water-swelled Zr-PAAm(s) hydrogels (3 days, 60 °C).

| zirconium salts                   | concentration (M) | $\epsilon_b$<br>(mm/mm) | $\sigma_b$<br>(MPa) | $E$<br>(MPa) | $W_e$<br>MJ m <sup>-3</sup> |
|-----------------------------------|-------------------|-------------------------|---------------------|--------------|-----------------------------|
| Zr(NO <sub>3</sub> ) <sub>4</sub> | 0.2               | 5.43±0.69               | 0.38±0.04           | 0.10±0.03    | 0.91±0.19                   |
|                                   | 0.4               | 13.63±1.22              | 2.45±0.19           | 0.34±0.01    | 34.16±4.19                  |
|                                   | 0.6               | 7.48±0.38               | 4.22±0.13           | 1.34±0.09    | 20.86±1.43                  |
| ZrCl <sub>4</sub>                 | 0.2               | 8.55±0.36               | 0.61±0.07           | 0.06±0.02    | 2.66±0.20                   |
|                                   | 0.4               | 12.40±1.33              | 3.65±0.36           | 0.95±0.02    | 21.73±4.09                  |
|                                   | 0.6               | 6.57±0.64               | 5.54±0.13           | 7.98±0.38    | 29.65±0.92                  |
| Zr(SO <sub>4</sub> ) <sub>2</sub> | 0.2               | 2.54±0.21               | 0.13±0.02           | 0.06±0.02    | 0.14±0.03                   |
|                                   | 0.4               | 12.23±0.04              | 1.56±0.38           | 0.25±0.02    | 14.24±0.05                  |
|                                   | 0.6               | 9.42±0.60               | 3.66±0.08           | 0.80±0.04    | 22.55±1.97                  |

Table S4a. The *RGB* value of the different interference colors of dried Zr-PAAm (0.4-NO<sub>3</sub>) hydrogels under different tensile strains.

| <i>RGB</i> value \ Strain (mm/mm) | Strain (mm/mm) |     |     |     |     |     |     |     |
|-----------------------------------|----------------|-----|-----|-----|-----|-----|-----|-----|
|                                   | 3              | 6   | 8   | 11  | 14  | 20  | 34  | 47  |
| <i>R</i>                          | 202            | 231 | 176 | 4   | 27  | 204 | 229 | 188 |
| <i>G</i>                          | 177            | 158 | 50  | 89  | 151 | 171 | 132 | 94  |
| <i>B</i>                          | 164            | 26  | 100 | 182 | 136 | 5   | 87  | 155 |

Table S4b. The *RGB* value of the different interference colors of dried Zr-PAAm (0.4-Cl) hydrogels under different tensile strains.

| <i>RGB</i> value \ Strain (mm/mm) | Strain (mm/mm) |     |     |     |     |
|-----------------------------------|----------------|-----|-----|-----|-----|
|                                   | 6              | 14  | 23  | 30  | 40  |
| <i>R</i>                          | 211            | 232 | 222 | 197 | 155 |
| <i>G</i>                          | 186            | 165 | 111 | 72  | 49  |
| <i>B</i>                          | 171            | 29  | 18  | 111 | 173 |

Table S4c. The *RGB* values of the different interference colors of dried Zr-PAAm (0.4-SO<sub>4</sub>) hydrogels under different tensile strains.

| <i>RGB</i> value \ Strain (mm/mm) | Strain (mm/mm) |     |     |     |     |     |     |
|-----------------------------------|----------------|-----|-----|-----|-----|-----|-----|
|                                   | 3              | 14  | 17  | 21  | 25  | 30  | 33  |
| <i>R</i>                          | 187            | 191 | 141 | 12  | 0   | 80  | 118 |
| <i>G</i>                          | 163            | 102 | 34  | 61  | 115 | 156 | 167 |
| <i>B</i>                          | 167            | 2   | 89  | 148 | 145 | 80  | 36  |

Table S5. The *RGB* values of the interference colors of Zr-PAAm (0.4-NO<sub>3</sub>) dried gel under different tensile strains.

| <i>RGB</i> value | Strain (mm/mm) |     |     |     |     |     |
|------------------|----------------|-----|-----|-----|-----|-----|
|                  | 6              | 8   | 11  | 14  | 20  | 34  |
| <i>R</i>         | 0              | 75  | 206 | 50  | 195 | 102 |
| <i>G</i>         | 26             | 152 | 73  | 205 | 125 | 205 |
| <i>B</i>         | 165            | 65  | 156 | 50  | 121 | 170 |



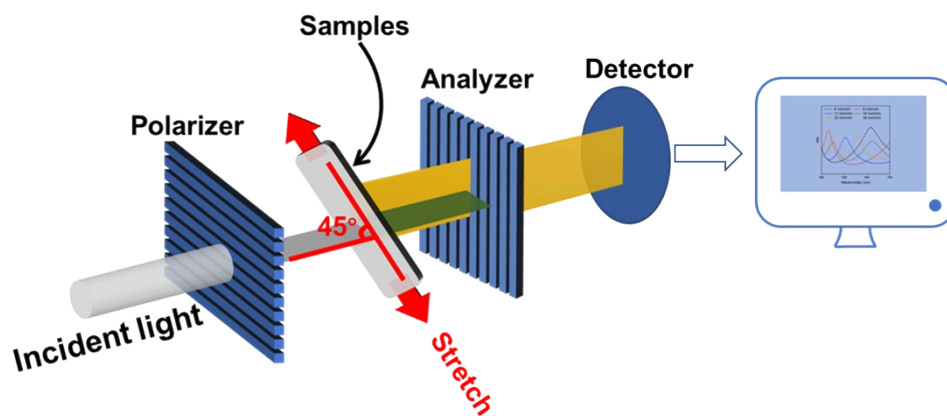

Figure S1. The schematic illustration for the measurement of polarized UV-Vis spectra of stretched samples.

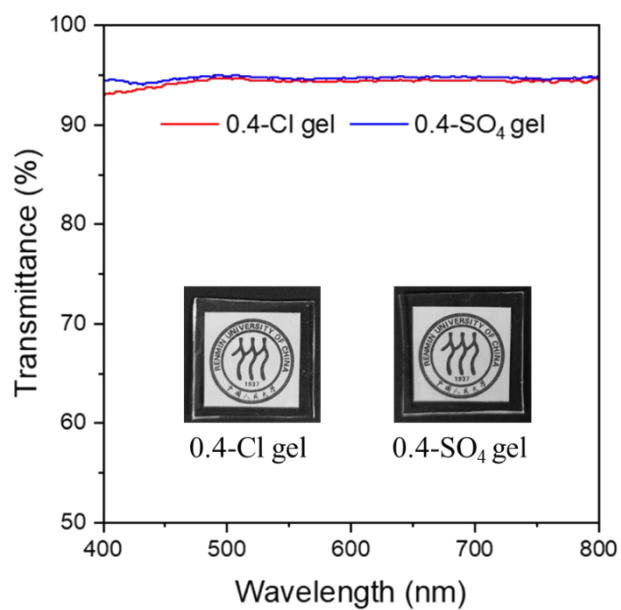

Figure S2. The transmittance of Zr-PAAm (0.4-Cl) and Zr-PAAm (0.4-SO<sub>4</sub>) hydrogels. The inset images showed the high transparency of these Zr-PAAm hydrogels. The thickness of hydrogels was about 1.0 mm.

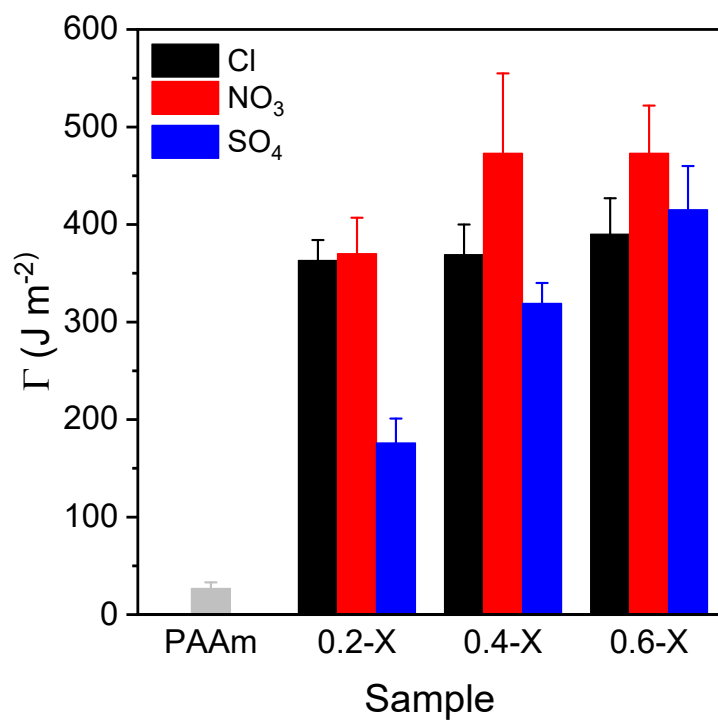

Figure S3. The fracture energy ( $\Gamma$ ) of covalently crosslinked PAAm hydrogels and Zr-PAAm hydrogels.

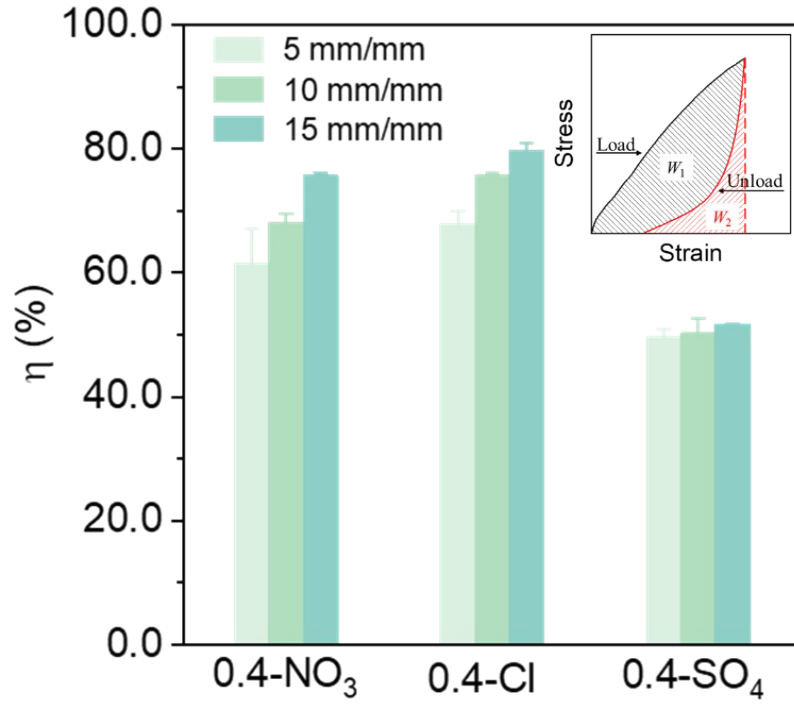

Figure S4. The energy dissipation coefficient of Zr-PAAm hydrogels at various strains (5 mm/mm, 10 mm/mm, 15 mm/mm). The inset showed the integral value of  $W_1$  and  $W_2$ .

The energy dissipation coefficient ( $\eta$ ) was calculated from the following equation:

$$\eta = \frac{W_1}{W_1 + W_2}$$

Where  $W_1$  was the area under the loading curve (marked by black color) and  $W_2$  was the area under the unloading curve (marked by red color), as shown in the inset.

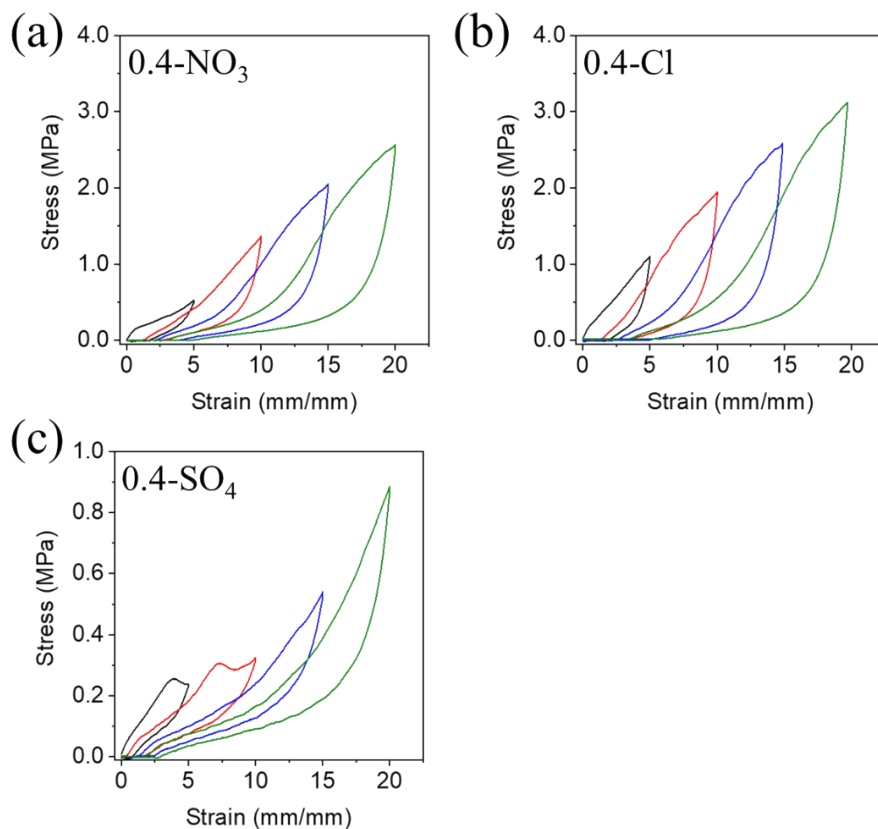

Figure S5. The successively tensile loading-unloading curves of one hydrogel with the increasing strain ( $\epsilon_m=5$  mm/mm, 10 mm/mm, 15 mm/mm, 20 mm/mm).

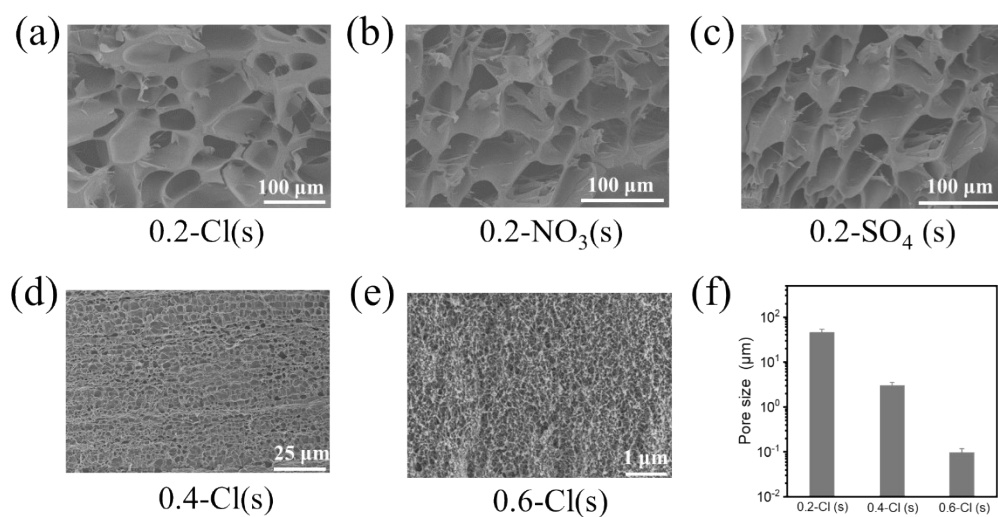

Figure S6. SEM images of Zr-PAAm (0.2-X(s)) hydrogels (a-c), Zr-PAAm (0.4-Cl(s)) (d), Zr-PAAm (0.6-Cl(s)) (e), and the comparison of pore sizes of Zr-PAAm (*m*-Cl(s)) hydrogels (f).

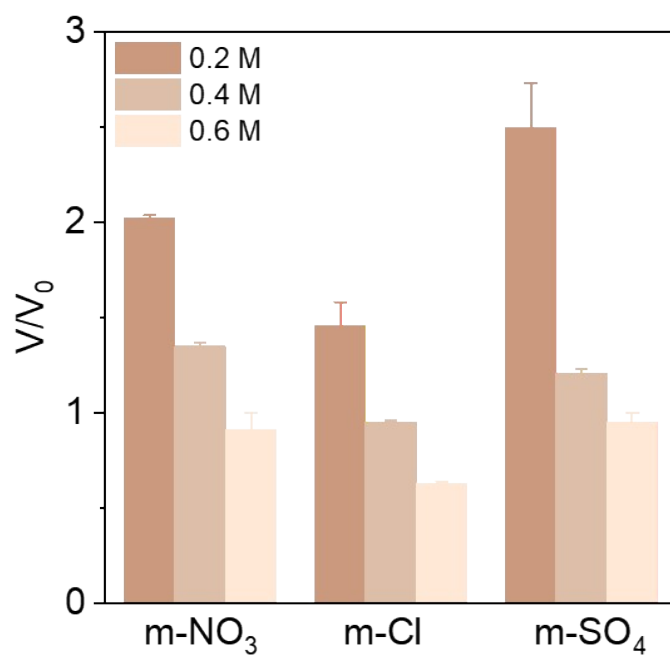

Figure S7. The size variations of Zr-PAAm hydrogels after swelling in water for 3 days at 60 °C. The  $V_0$  and  $V$  represented the volume of as-prepared Zr-PAAm and swollen Zr-PAAm(s) hydrogels, respectively.

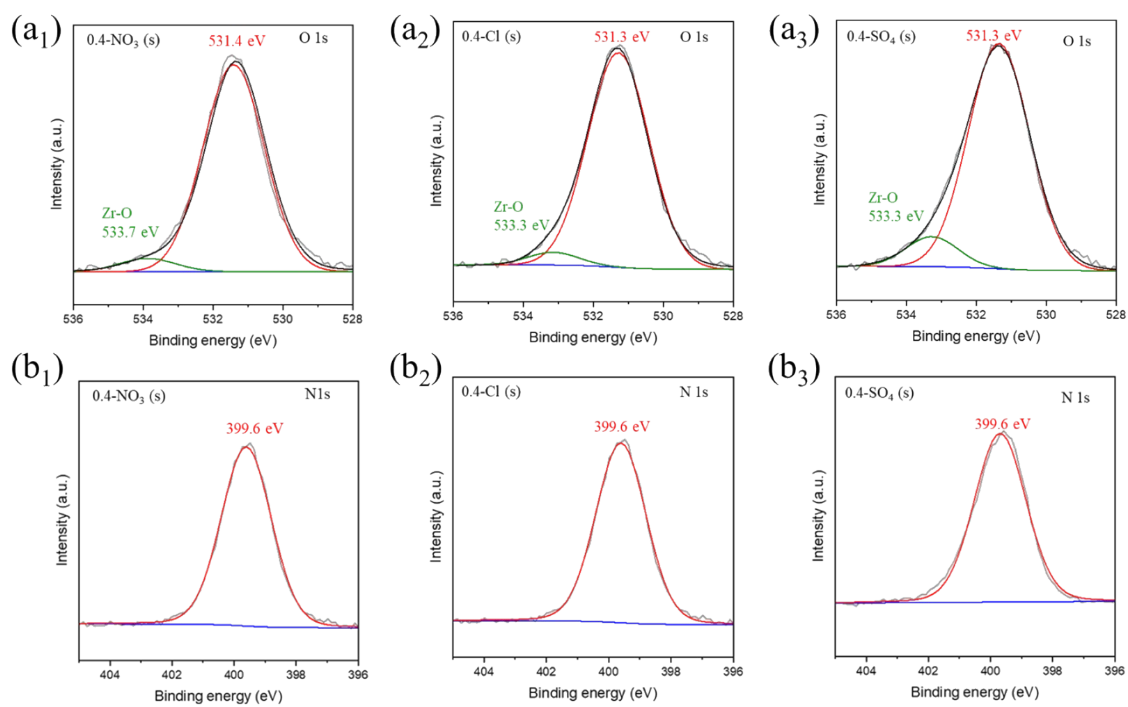

Figure S8. High-resolution XPS spectra of deconvoluted (a) O 1s and (b) N 1s of Zr-PAAm(s) hydrogels.



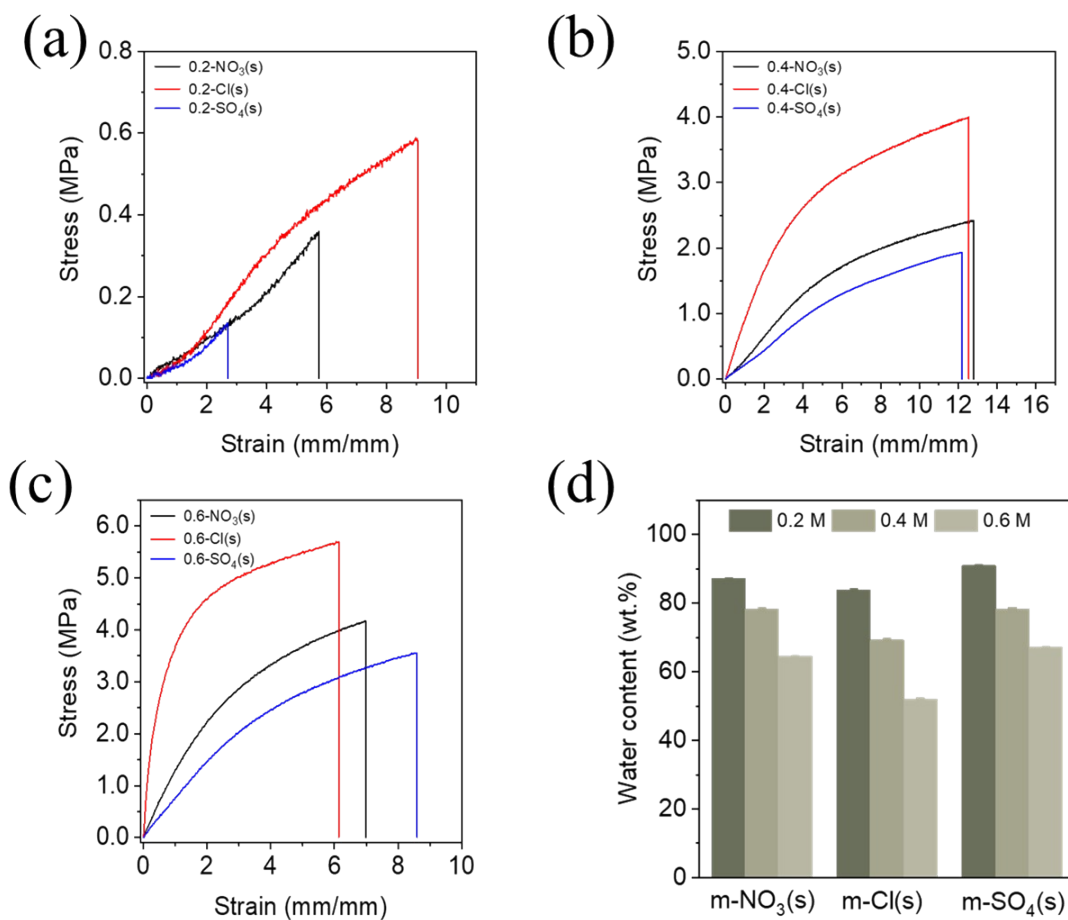

Figure S9. The properties of Zr-PAAm hydrogels after swelling in water for 3 days at 60 °C. (a-c) The tensile curves. (d) The water content.

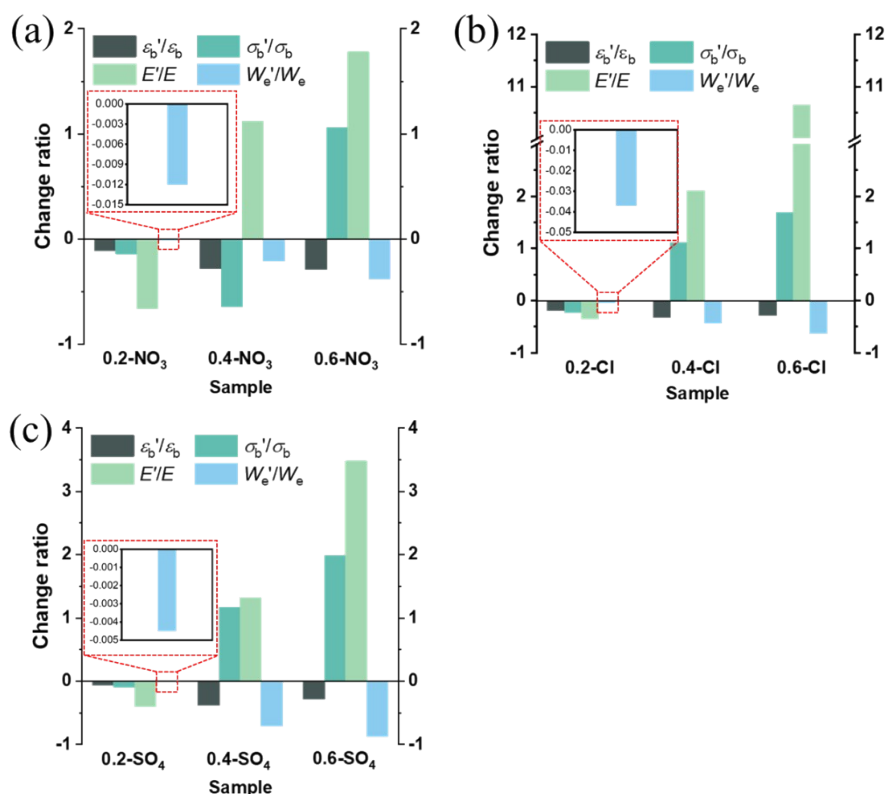

Figure S10. The summary of the change ratios of the fracture strain ( $\epsilon_b$ ), fracture stress ( $\sigma_b$ ), elastic modulus ( $E$ ), toughness ( $W_e$ ) of Zr-PAAM hydrogels before and after swelling (with the apostrophe ') in water for 3 days at 60 °C. (a) Zr-PAAM ( $m$ -NO<sub>3</sub>) hydrogels, (b) Zr-PAAM ( $m$ -Cl) hydrogels, (c) Zr-PAAM ( $m$ -SO<sub>4</sub>) hydrogels.

The negative change ratio indicated a decreased property after swelling. For example, as shown in Figure S10a, the  $W'_e/W_e$  value of 0.2-NO<sub>3</sub> hydrogel was about -0.012, representing the  $W_e$  of 0.2-NO<sub>3</sub>(s) hydrogels was 0.012 times as small as that of 0.2-NO<sub>3</sub> hydrogels. The positive change ratio indicated the enhanced properties after swelling. For example, as shown in Figure S10b, the  $W'_e/W_e$  of 0.6-Cl hydrogel was about 11, representing the  $W_e$  of 0.6-Cl(s) hydrogels was 11 times as high as that of 0.6-Cl hydrogels.

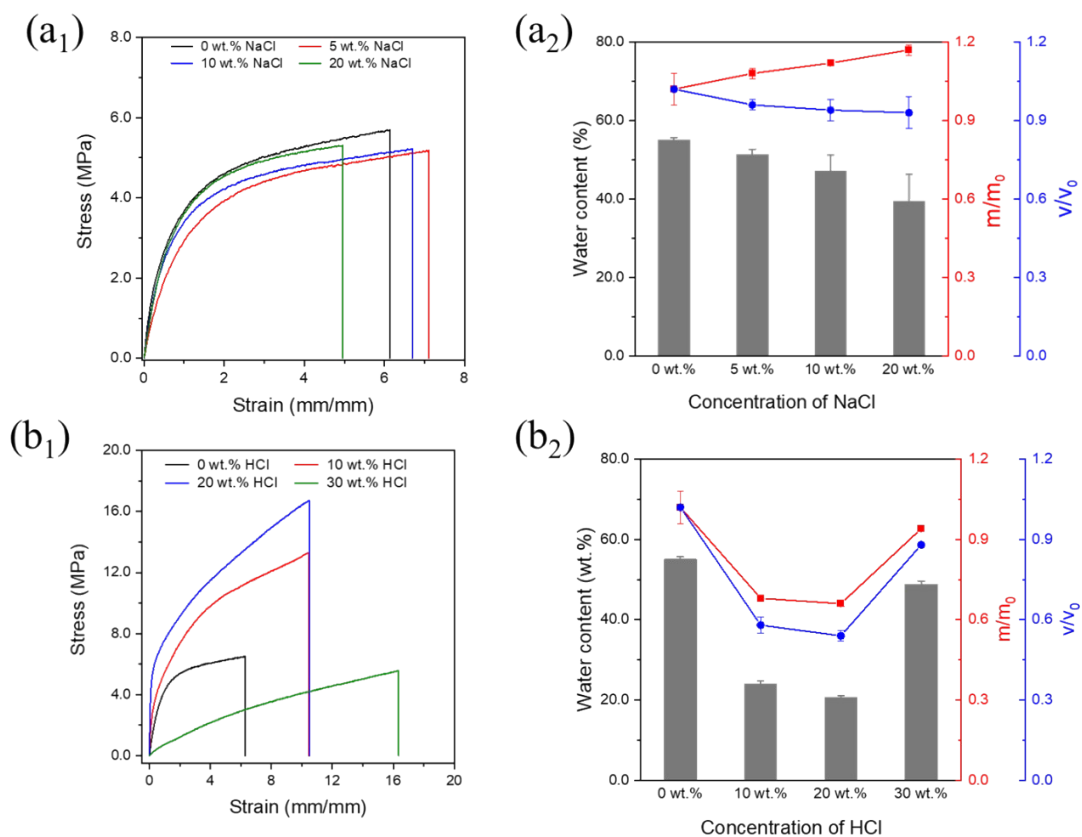

Figure S11. The properties of Zr-PAAm (0.6-Cl(s)) hydrogels after swelling in concentrated (a) NaCl solutions and (b) HCl solution. (a<sub>1</sub>, b<sub>1</sub>) tensile curves and (a<sub>2</sub>, b<sub>2</sub>) the water content, the variations of weights and size. The  $m_0$  and  $v_0$  represent the mass and volume of Zr-PAAm (0.6-Cl(s)) hydrogel before swelling, while the  $m$  and  $v$  are for the mass and volume of Zr-PAAm (0.6-Cl(s)) hydrogel after swelling, respectively.

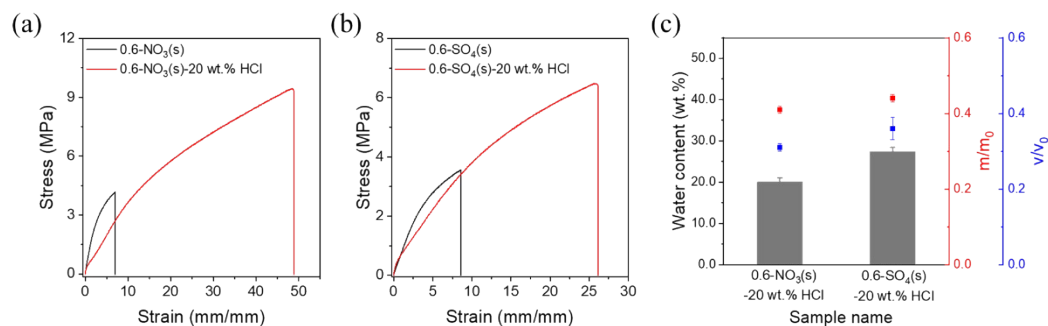

Figure S12. The property changes of Zr-PAAm(s) hydrogels after swelling in 20 wt.% HCl solution for 10 days at room temperature. (a) 0.6-NO<sub>3</sub>(s) hydrogels, (b) 0.6-SO<sub>4</sub>(s) hydrogels. (c) The water content, the variations of weights, and sizes of 0.6-NO<sub>3</sub>(s) and 0.6-SO<sub>4</sub>(s) hydrogels. The  $m/m_0$  and  $v/v_0$  represent the change ratios of mass and volume of Zr-PAAm(s) hydrogels after soaking in 20 wt.% HCl solution, respectively.

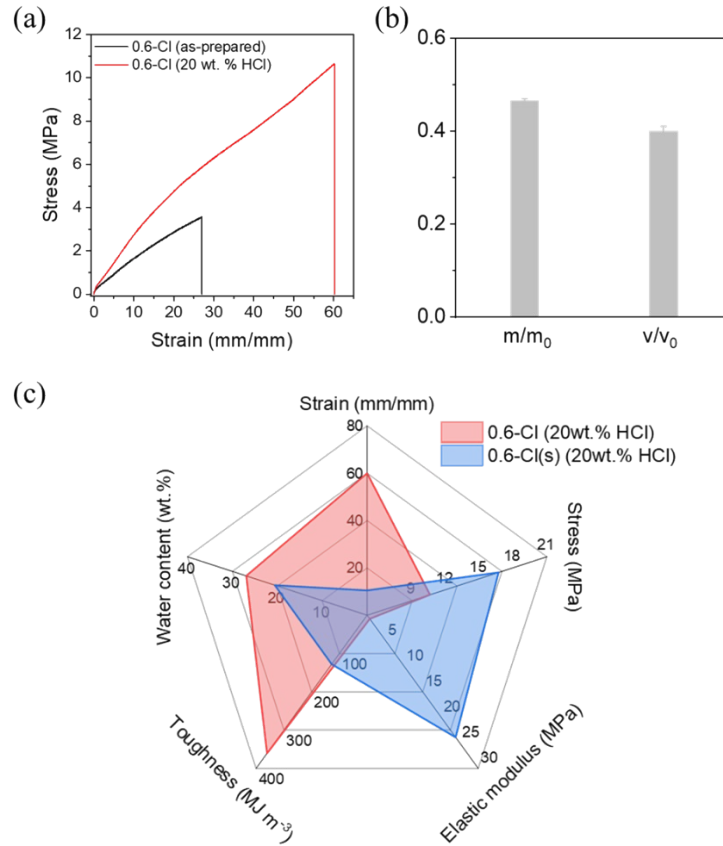

Figure S13. (a) The property changes of as-prepared Zr-PAAm (0.6-Cl) hydrogels after soaking in 20 wt.% HCl solution for 10 days at room temperature. (b) The variations of weights and size of hydrogels after immersion in 20 wt.% HCl solution. The  $m/m_0$  and  $v/v_0$  represent the change ratios of mass and volume of as-prepared 0.6-Cl hydrogels after immersion in 20 wt.% HCl solution, respectively. (c) The comparison of water content, fracture strain, fracture stress, elastic modulus, and toughness of Zr-PAAm (0.6-Cl) and Zr-PAAm (0.6-Cl(s)) hydrogels after immersion in 20 wt.% HCl solution.

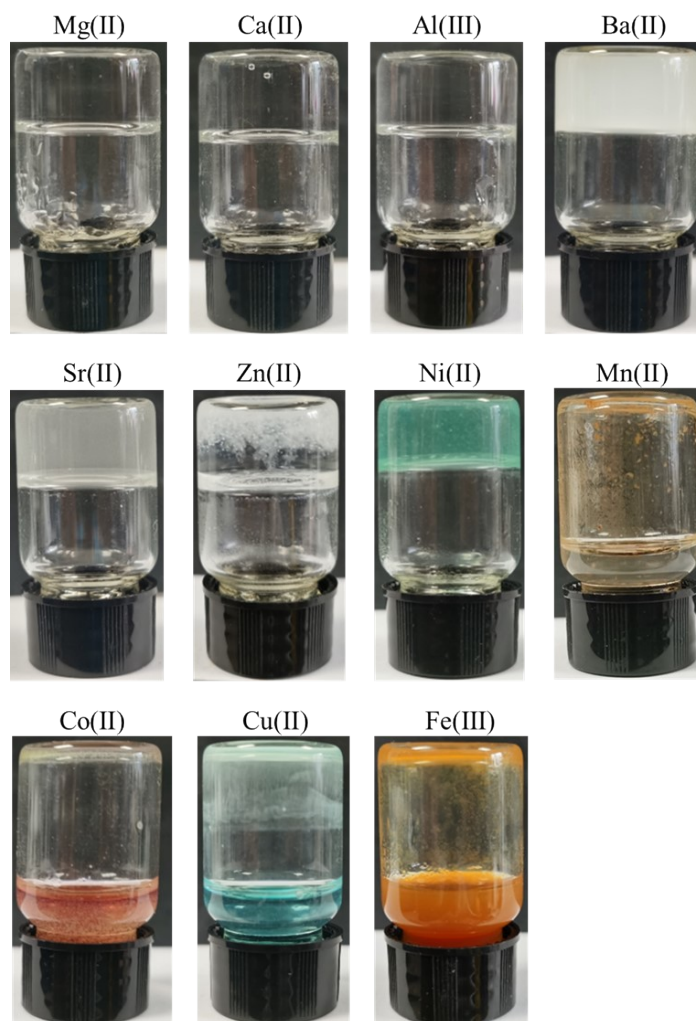

Figure S14. The formation of PAAm hydrogels in the presence of different metal ions.

The concentration of different metal ions was kept at 0.2 M. And the preparation process followed that for preparing Zr-PAAm hydrogels.

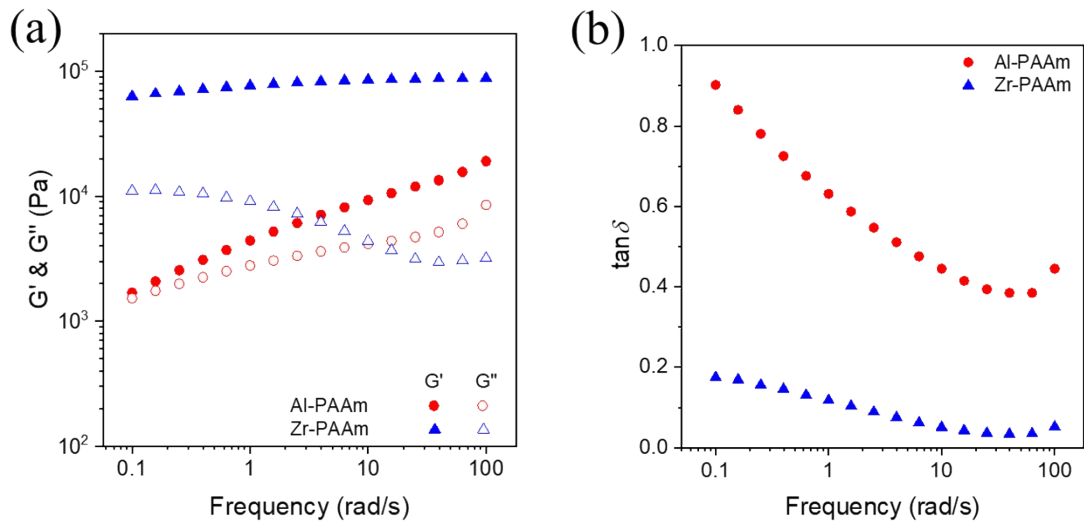

Figure S15. (a) The storage moduli ( $G'$ ) and loss moduli ( $G''$ ), (b) loss factor of hydrogels prepared in the presence of  $\text{AlCl}_3$  or  $\text{ZrCl}_4$ . The concentration of metal ions was kept at 0.2 M.

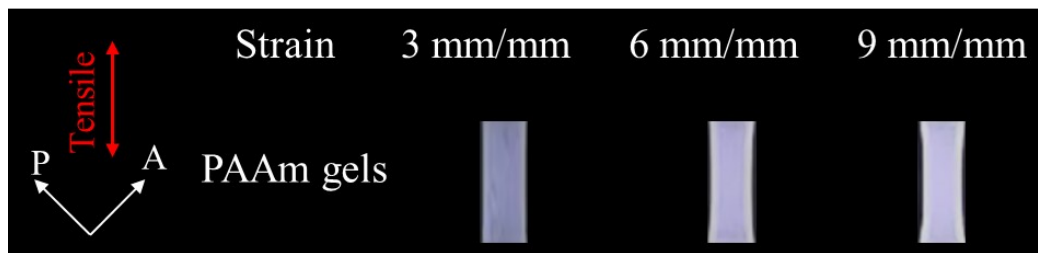

Figure S16. The interference colors of chemically crosslinked PAAm hydrogels under successively increasing tensile strain.



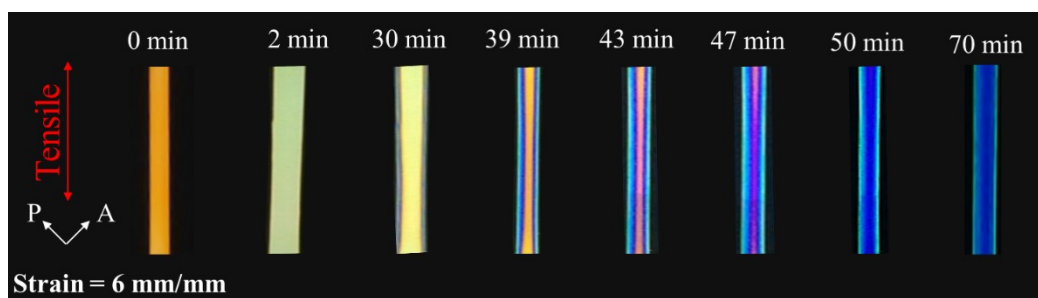

Figure S17. The change of the interference color of a stretched Zr-PAAm (0.4-NO<sub>3</sub>) hydrogel kept at 6 mm/mm strain during drying. In the drying process, the orange color of the hydrogel first changed to pale yellow and then to blue, showing the oriented PAAm chains in stretched hydrogel experienced a relaxation at first, then the evaporation of water induced shrinkage of the hydrogels and fixed the orientation of PAAm chains, leading to the increase in the order of interference colors.

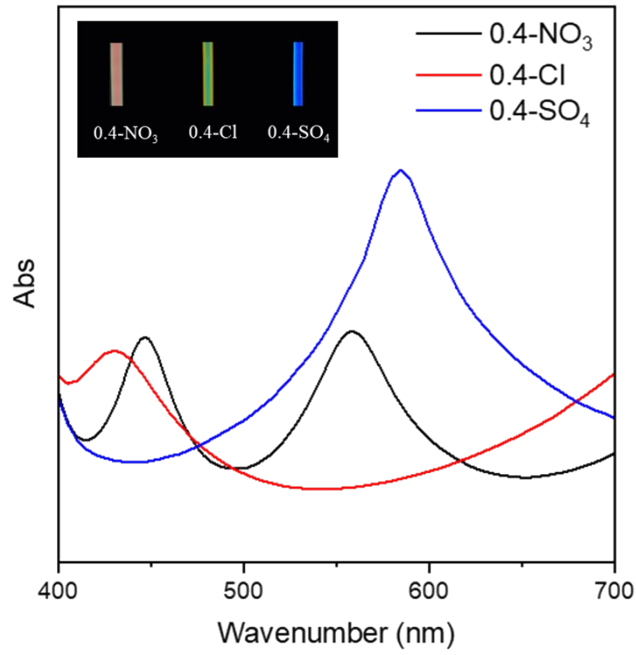

Figure S18. The UV-vis absorption spectra between crossed polarizers of dried 0.4-NO<sub>3</sub>, 0.4-Cl, and 0.4-SO<sub>4</sub> gels at 20 mm/mm tensile strains. The inset showed the interference colors of dried gels.

We have calculated the optical path difference (retardation  $R$ ) based on the UV-vis absorption spectra (Figure S18) and the following equation S1<sup>1</sup>:

$$T(R, \lambda) = \sin^2\left(\frac{\pi R}{\lambda}\right) \quad (S1)$$

Where  $T$  is the transmittance between crossed polarizers,  $R$  is the retardation and  $\lambda$  is the wavelength of incident light.

## Reference

- 1 S. A. Linge Johnsen, J. Bollmann, H. W. Lee and Y. Zhou, *J. Microsc.* 2018, 269, 321-337.
